## Subscription and Business Information

*The American Journal of Psychiatry*, ISSN 0002-953X, is published monthly by the American Psychiatric Association.

The American Psychiatric Association does not hold itself responsible for statements made in its publications by contributors or advertisers. Unless so stated, material in *The American Journal of Psychiatry* does not reflect the endorsement, official attitude, or position of the American Psychiatric Association or of the Journal's Editorial Board.

Periodicals postage paid at Arlington, VA, and additional mailing offices. POSTMASTER: Send address changes to *The American Journal of Psychiatry*, Circulation Department, American Psychiatric Association, 1000 Wilson Blvd., Suite 1825, Arlington, VA 22209-3901.

### Editorial Office

*American Journal of Psychiatry*  
American Psychiatric Association  
1000 Wilson Blvd., Suite 1825  
Arlington, VA 22209-3901  
Phone: (703) 907-7885, (703) 907-7889  
E-mail: [ajp@psych.org](mailto:ajp@psych.org)

### Customer Service

Phone: (800) 368-5777 (toll-free)  
E-mail: [appi@psych.org](mailto:appi@psych.org)

### APA Member Subscription Services

Phone: (888) 35-PSYCH (toll-free)

### Subscriptions

Per year: individual \$318.00,  
international \$478.00

Institutional subscriptions are tier priced. For institutional site license or pricing information, contact (703) 907-8538 or [institutions@psych.org](mailto:institutions@psych.org).

*Additional subscription options, including single issues and student rates*

Contact Customer Service

### Advertising

*Pharmaceutical Print and Online Advertising*  
Frank Cox, Kathleen Harrison, Tim Wolfinger  
Pharmaceutical Media, Inc.  
30 East 33rd Street  
New York, NY 10016  
Phone: (212) 904-0379  
E-mail: [twolfinger@pminy.com](mailto:twolfinger@pminy.com)

### *Nonpharmaceutical and Online Sales*

Eamon Wood  
Pharmaceutical Media, Inc.  
E-mail: [ewood@pminy.com](mailto:ewood@pminy.com)  
(see address and phone above).

### Permissions and Reprints

Material published in the journals of the American Psychiatric Association and American Psychiatric Association Publishing is protected by copyright and all rights are reserved. Material may not be reproduced in any form or by any means without written permission from the copyright owner. For permission to reproduce material published by APA, please visit [http://www.appi.org/Customer\\_Service/Pages/Permissions.aspx](http://www.appi.org/Customer_Service/Pages/Permissions.aspx) for more information. Permission can also be secured through the Copyright Clearance Center ([www.copyright.com](http://www.copyright.com)).

APA does not require that permission be obtained for the photocopying of isolated articles for nonprofit classroom or library reserve use; all fees associated with such permission are waived. This consent does not extend to other kinds of copying, such as copying for general distribution, for advertising or promotional purposes, for creating new collective works, or for resale. Requests for commercial distribution should be directed to (703) 907-7889.

For bulk reprints, please contact Jane Cha, (703) 907-7889; email: [jcha@psych.org](mailto:jcha@psych.org).

Indexed in Abstracts for Social Workers, Academic Abstracts, Biological Abstracts, Chemical Abstracts, Chicago Psychoanalytic Literature Index, Cumulative Index to Nursing Literature, Excerpta Medica, Hospital Literature Index, Index Medicus, International Nursing Index, Nutrition Abstracts, Psychological Abstracts, Science Citation Index, Social Science Source, and Social Sciences Index.

Pages are produced by Sheridan Journal Services (Waterbury, VT) and printed by Sheridan NH (Hanover, NH) on acid-free paper effective with Volume 169, Number 1, January 2012.

© 2017 American Psychiatric Association.

# Psychiatrist Opportunities

Philadelphia, PA

Einstein Behavioral Health is a comprehensive treatment facility in Philadelphia, Pennsylvania. We are seeking:

- Medical Director, Behavioral Health Service
- FT Psychiatrist for General Adult Inpatient Psychiatry Unit
- Geropsychiatrist
- CRC Medical Director

Our programs offer a full range of adult inpatient mental health services, including an alcohol and chemical dependency treatment unit and a geriatric diagnostic center. Our full continuum of care also includes intensive outpatient programs, partial hospitalization programs and an outpatient medication management clinic.

This opportunity includes an innovative, competitive compensation model and an excellent working environment as a member of a large, experienced behavioral medicine team.

Einstein Behavioral Health offers programs to address behavioral health issues for all ages. Our 36-bed Long Term Structured Residence (LTSR) services both adults and older adults, and our Adult Crisis Response Center (CRC) is a crisis/emergency psychiatry facility. Our Child and Adolescent Crisis Response Center includes a full range of services for children and adolescents.

We are part of Einstein Healthcare Network, a large, comprehensive healthcare network, and have a long history of providing excellent patient care and a high level of physician satisfaction.

For more information, please contact  
**Kim Hannan, Physician Recruiter,**  
HannanKi@einstein.edu or call  
**267-421-7435.**

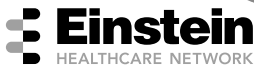

EOE

## Pocket Guide to Psychiatric Evaluation of Adults

American Psychiatric Association

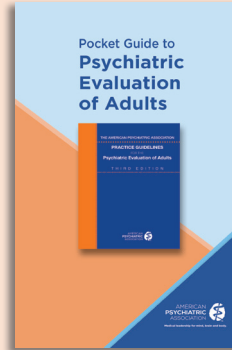

This new *Pocket Guide*, based on the 2015 edition of the *Practice Guidelines for the Psychiatric Evaluation of Adults*, focuses on the initial psychiatric evaluation, including additional domains of evaluation relevant to CPT documentation requirements.

2017 • 14 pages • ISBN 978-0-89042-681-4 • Spiralbound • \$9.95 • Item #2681

AMERICAN  
PSYCHIATRIC  
ASSOCIATION  
PUBLISHING

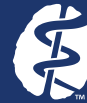

www.appi.org  
Email: appi@psych.org  
Phone: 1-800-368-5777

AH1723A

### Inpatient and Outpatient Psychiatrist Opportunities

*Are you ready  
to achieve a higher state of caring?*

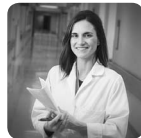

Baystate Health, home of the University of Massachusetts Medical School-Baystate, is searching for ABMS BC/BE Psychiatrists to join our Department of Psychiatry at Baystate Noble Hospital in Westfield, Massachusetts.

These opportunities feature flexible scheduling, compensated call, a faculty appointment to the University of Massachusetts Medical School-Baystate, mentoring opportunities, and a robust benefits package.

Baystate Noble Hospital is a 97-bed acute care community hospital featuring world-class technology, diagnostics, and Baystate Health specialists. An ideal combination of "high tech" and "high touch," a staff of highly trained and compassionate nurses and medical support personnel complements an outstanding medical staff.

At Baystate Health, you'll experience a deeper sense of compassion, greater breadth of diversity, and a never-ending desire to raise the standard of medical excellence — regionally and nationally.

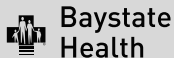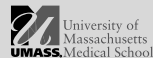

To apply or to learn more, please visit our website at  
[www.choosebaystatehealth.org/noble/ajp](http://www.choosebaystatehealth.org/noble/ajp)

Or contact Barry Sarvet, MD, Chair, Department of Psychiatry,  
c/o Elizabeth Fox, Physician Recruiter.  
413-794-7726 | [Elizabeth.Fox@baystatehealth.org](mailto:Elizabeth.Fox@baystatehealth.org)

*Together we deliver a higher state of caring.®*

Baystate Health is an Equal Opportunity employer. All qualified applicants will receive consideration for employment without regard to race, color, religion, sex, sexual orientation, gender identity, marital status, national origin, ancestry, age, genetic information, disability, or protected veteran status.

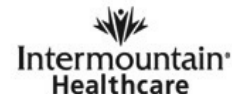

*Helping People Live the Healthiest Lives Possible.*

Psychiatrists (adult and child),  
Emergency-Access Center & Mental Health  
Integration are currently needed in:  
Bountiful • Logan • Ogden • Park City  
Salt Lake City • St. George

Employment with Intermountain Medical Group.  
Competitive salary with transition to production  
and additional income for meeting quality  
goals. Stipend available. Signing bonus and loan  
repayment available. Full Intermountain benefits  
to include defined pension, 401k match & CME.  
Relocation provided up to 15K.

For the second year in a row, Forbes magazine has  
named Intermountain one of the top 3 healthcare  
organizations, a top 25 employer overall.

Contact Intermountain Physician Recruiting.  
800-888-3134 [PhysicianRecruit@imail.org](mailto:PhysicianRecruit@imail.org)  
<http://physicianjobsintermountain.org>

Civilian Corps

# Behavioral Health Careers

Army Medicine Civilian Corps is committed to care for military personnel, beneficiaries and their families at Army hospitals and clinics worldwide.

- » Exceptional Benefits
- » Patient Focused Care
- » Opportunities Worldwide
- » Rewarding Careers
- » Flexible Work Schedules
- » No Military Requirements

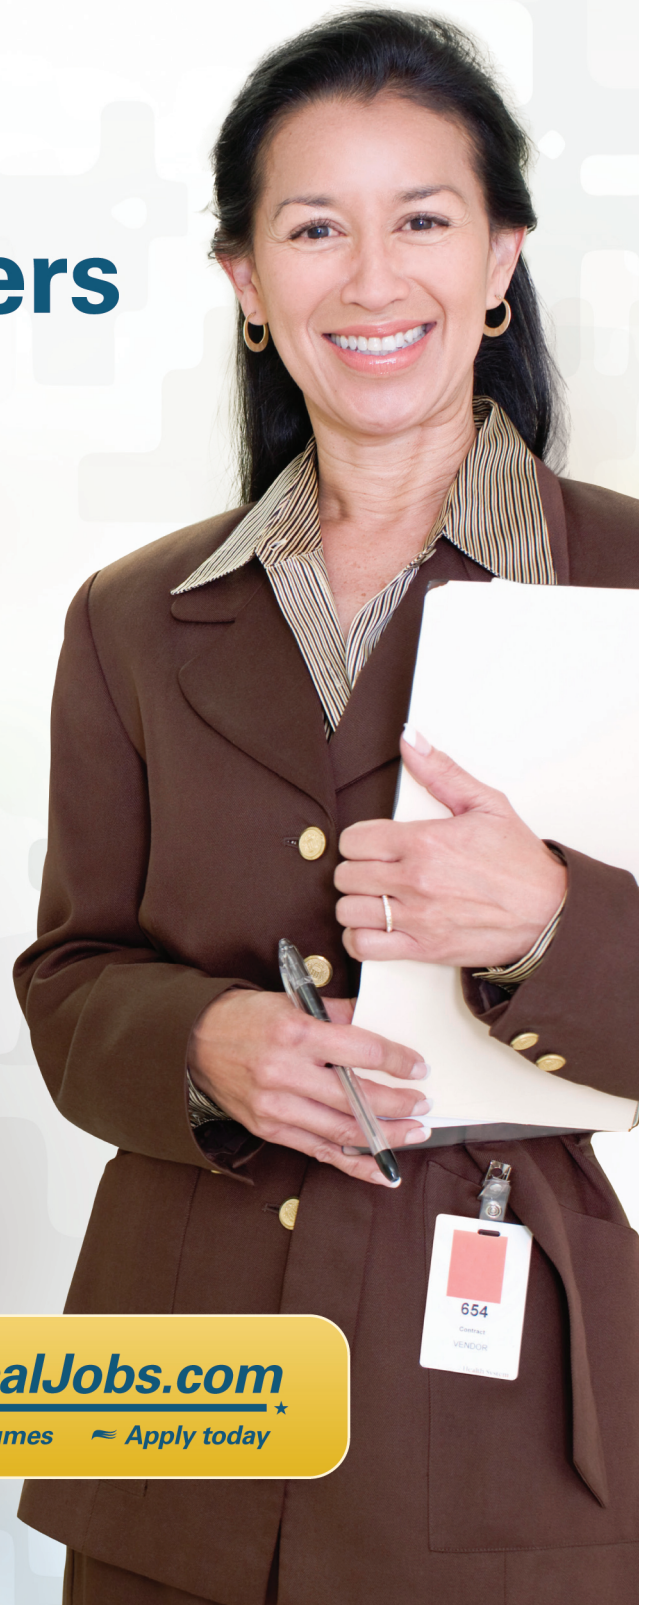

[CivilianMedicalJobs.com](http://CivilianMedicalJobs.com)

≈ Find Jobs ≈ Post Resumes ≈ Apply today

**civilian** CORPUS  
★ U.S. Army  
worldwide medical, behavioral health & dental careers

★ Vast Opportunities ★ Exceptional Benefits ★ Rewarding Careers

Army Medicine Civilian Corps employees are NOT subject to military requirements such as "boot camp," enlistments or deployments.

THE DEPARTMENT OF DEFENSE IS AN EQUAL OPPORTUNITY EMPLOYER.

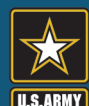

# We've got you covered.

For over 30 years, we have provided psychiatrists with exceptional protection and personalized service. We offer comprehensive insurance coverage and superior risk management support through an "A" rated carrier.

## ANNOUNCING NEW ENHANCEMENTS TO THE AMERICAN PSYCHIATRIC ASSOCIATION PSYCHIATRISTS' PROFESSIONAL LIABILITY PROGRAM:

- **Defense Expenses related to Licensing Board Hearings and Other Proceedings:** Increased Limit to \$50,000 per proceeding with NO annual aggregate (higher limits are available up to \$150,000)
- **Fire Legal Liability Coverage:** Limit of liability increased to \$150,000 for fire damage to third party property
- **Emergency Aid Coverage:** Reimbursement up to \$15,000 in costs and expenses for medical supplies
- Insured's **Consent to Settle** is now required in the settlement of any claim – No arbitration clause!
- **First Party Assault and Battery Coverage:** Up to \$25,000 reimbursement for medical expenses related to injuries and/or personal property damage caused by a patient or client
- **Medical Payments Coverage:** Increased limit to \$100,000 for Medical Payments to a patient or client arising from bodily injury on your business premises

## IN ADDITION WE CONTINUE TO OFFER THE FOLLOWING MULTIPLE PREMIUM DISCOUNTS:

- **50% Resident-Fellow Member Discount**
- **Up to 50% New Doctor Discount** (for those who qualify)
- **50% Part Time Discount** for up to 20 client hours a week or less
- **10% New Policyholder Discount** (must be claims free for the last 6 months)
- **15% Child and Adolescent Psychiatrist Discount** for those whose patient base is more than 50% Children and Adolescents
- **10% Claims Free Discount** for those practicing 10 years, after completion of training, and remain claims free
- **5% Risk Management Discount** for 3 hours of CME

*(Above Coverage Features and Discounts are subject to individual state approval)*

Visit us at [apamalpractice.com](http://apamalpractice.com) or call **877.740.1777** to learn more.

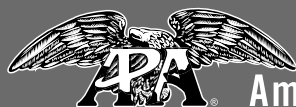

**American Professional Agency**

LEADERS IN PSYCHIATRIC MEDICAL LIABILITY INSURANCE

ENDORSED BY THE  
AMERICAN PSYCHIATRIC  
ASSOCIATION
