# American Psychiatric Association Publishing Textbook of Psychopharmacology, Fifth Edition

Edited by Alan F. Schatzberg, M.D., and Charles B. Nemeroff, M.D., Ph.D.

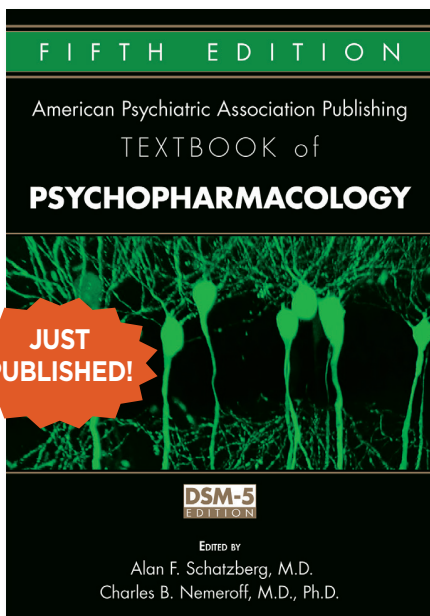

The *American Psychiatric Association Publishing Textbook of Psychopharmacology* is an indispensable and comprehensive resource for clinicians and trainees who prescribe psychotropic medications. Updated to reflect the new DSM-5 classification, this revised Fifth Edition maintains the user-friendly structure of its predecessors while offering in-depth coverage of the latest research in pharmacological principles, classes of drugs, and psychiatric disorders. Introductory chapters provide a theoretical grounding in clinical applications, with topics ranging from neurotransmitters to brain imaging in psychopharmacology. The bulk of the book is devoted to various classes of drugs, including antidepressants, anxiolytics, antipsychotics, mood stabilizers, and other agents, with each class divided into chapters on specific drugs—either new or revised to include the latest findings and trends.

Finally, the section on psychopharmacological treatment addresses evidence-based principles of clinical care for the full spectrum of mental disorders and conditions as well as for specific populations and circumstances—offering information on topics such as medication selection, combination and maintenance dosing regimens, monitoring and management of side effects, and strategies for optimizing treatment response.

## The book's beneficial features are many:

- The section on principles of pharmacology has been revised and reorganized to incorporate recent discoveries from the fields of neurobiology, genetics, brain imaging, and epidemiology.
- History and discovery, structure-activity relationships, pharmacological profiles, pharmacokinetics and disposition, mechanisms of action, indications and efficacy, side effects and toxicology, and drug-drug interactions are addressed for each agent. This consistent structure places the desired information at the clinician's fingertips and facilitates study for trainees.
- Coverage of drugs approved since the last edition is thorough, encompassing new antidepressants (e.g., vortioxetine), new antipsychotics (e.g., cariprazine), and agents on the clinical horizon (e.g., ketamine).

A work of uncommon scientific rigor and clinical utility, *The American Psychiatric Association Publishing Textbook of Psychopharmacology* provides state-of-the-art information on both the principles and the practice of psychopharmacological treatment of psychiatric disorders.

2017 • 1,823 pages • ISBN 978-1-58562-523-9 • Hardcover • \$299.00 • Item #62523

2017 • 1,823 pages • ISBN 978-1-61537-122-8 • eBook • \$240.00 • Item #37122

AMERICAN  
PSYCHIATRIC  
ASSOCIATION  
PUBLISHING

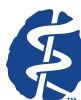

[www.appi.org](http://www.appi.org)

Email: [appi@psych.org](mailto:appi@psych.org)

Toll Free: 1-800-368-5777

20% Discount for American Psychiatric Association Members  
25% Discount for APA Resident-Fellow Members

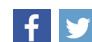

Priority Code AH1713

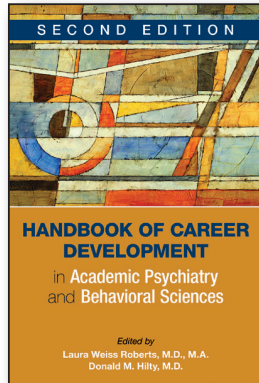

## Handbook of Career Development in Academic Psychiatry and Behavioral Sciences, Second Edition

Edited by Laura Weiss Roberts, M.D., M.A., and Donald M. Hilty, M.D.

*The Handbook of Career Development in Academic Psychiatry and Behavioral Sciences, Second Edition, provides real-world advice with compassion. Readers will find just what they need when they need it: step-by-step guidance to approaching the tasks and challenges that face them, questions to discuss with mentors and colleagues, and professionally vetted online career development resources.*

2017 • 437 pages • ISBN 978-1-61537-058-0 • Paperback • \$69.00 • Item #37058

2017 • 437 pages • ISBN 978-1-61537-123-5 • eBook • \$55.00 • Item #37123

## Basics of Psychotherapy

A Practical Guide to Improving Clinical Success

Richard B. Makover, M.D.

*Basics of Psychotherapy* is written in a clear, straightforward style that reads easily and conveys its ideas with engaging simplicity. Every point is skillfully illustrated by clinical examples. Scripted excerpts of therapy sessions not only reproduce the dialogue, they also contain notes and commentary that explain exactly what is happening between therapist and patient. Tables and illustrations summarize the topics explained in the text. This practical and up-to-date book should be of use to the beginning therapist and the experienced clinician alike.

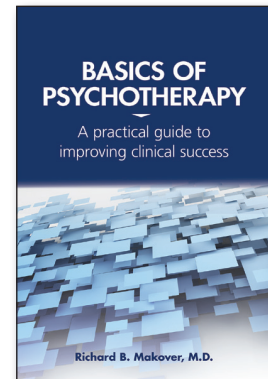

2017 • 332 pages • ISBN 978-1-61537-076-4 • Paperback • \$59.00 • Item #37076

2017 • 332 pages • ISBN 978-1-61537-132-7 • eBook • \$47.00 • Item #37132

Order Now [www.appi.org](http://www.appi.org)

20% Discount for American Psychiatric Association Members  
25% Discount for APA Resident-Fellow Members

Please use Priority Code AH1737 when ordering.

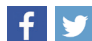

AMERICAN  
PSYCHIATRIC  
ASSOCIATION  
PUBLISHING

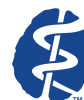

[www.appi.org](http://www.appi.org)

Email: [appi@psych.org](mailto:appi@psych.org)

Toll Free: 1-800-368-5777

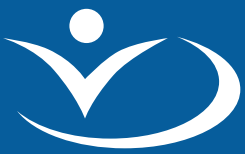

**Interior Health**  
Every person matters

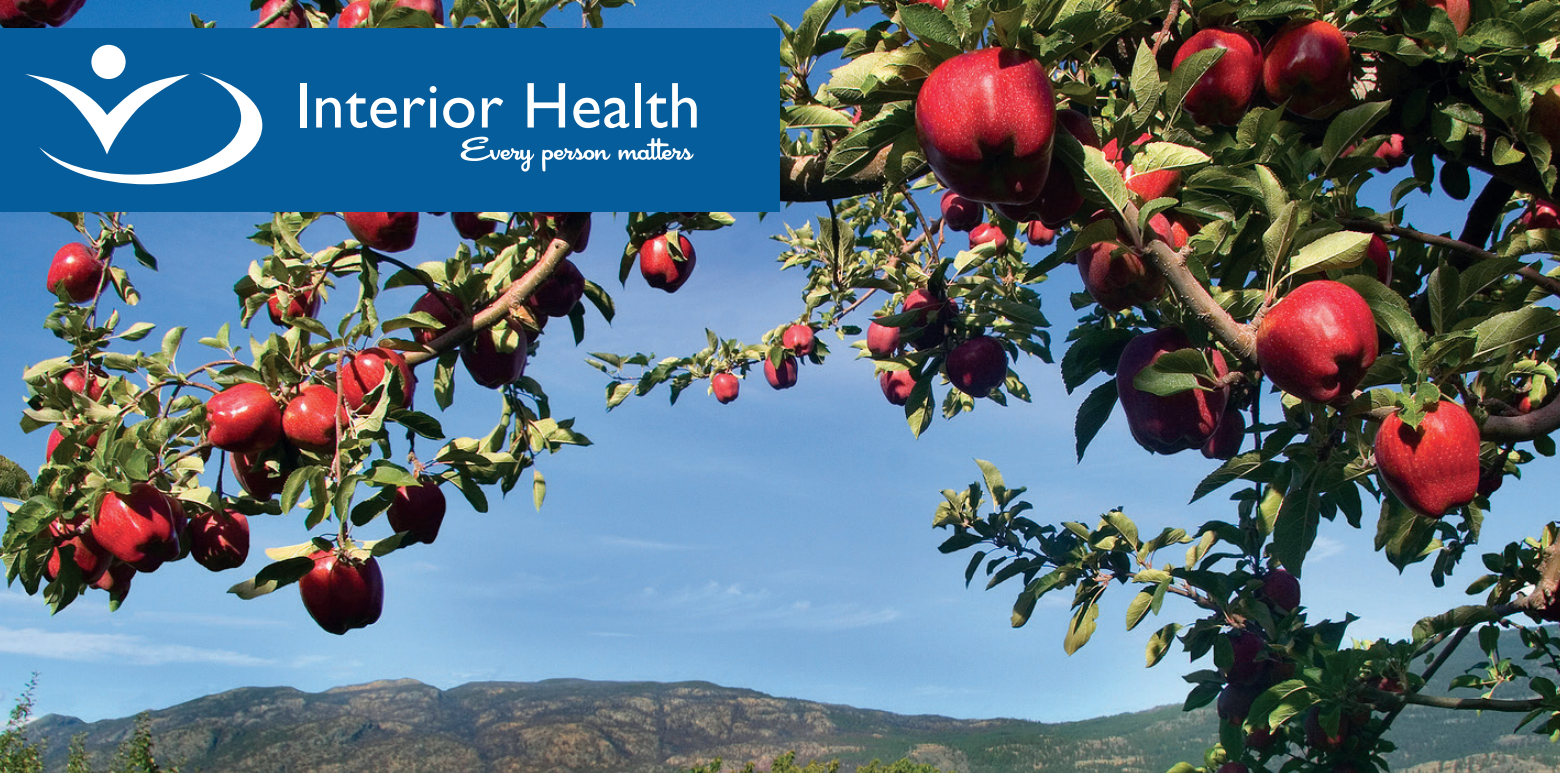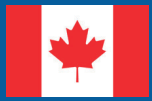

# Psychiatrist Opportunities Beautiful British Columbia, Canada

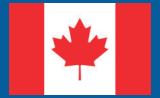

*General Adult ~ Child & Youth ~ Geriatrics ~ Addictions ~ Tertiary*

*The choice is yours!*

Choose the Southern Interior of BC. Choose the community that fits your lifestyle. Choose Interior Health!

Whether it's for the communities, the friendly people or the endless outdoor adventures right out your back door, come and experience the many reasons you will love living here.

Interior Health has fantastic permanent practice opportunities available. Contact us today and discover the rewards of working in British Columbia, Canada.

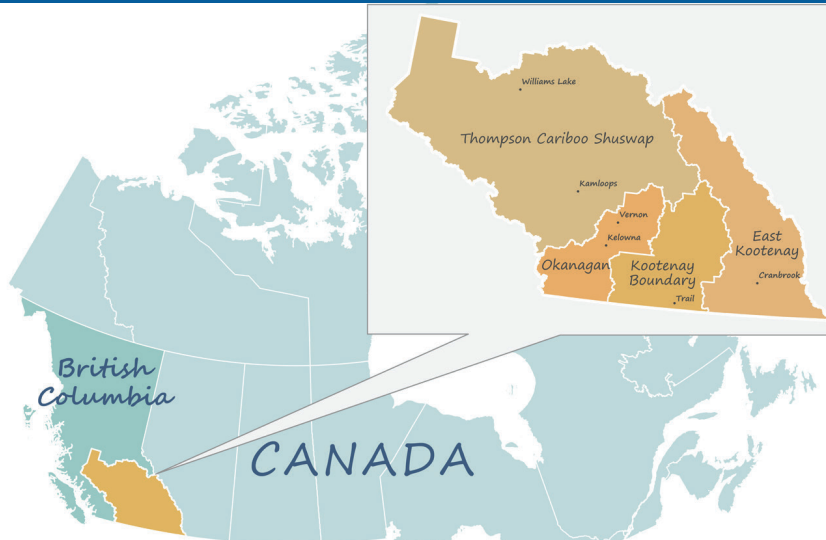

*Come live, work and play...  
...where others only vacation!*

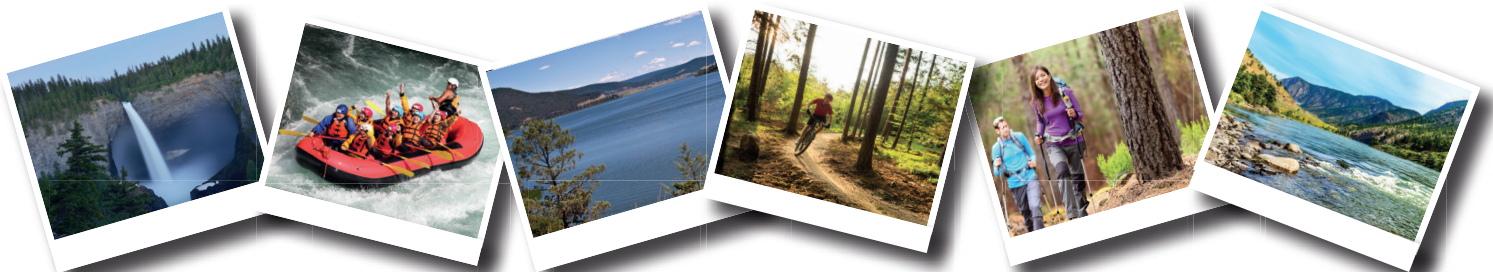

**For more information and to apply, contact:**  
**PhysicianRecruitment@InteriorHealth.ca**

**www.betterhere.ca**

Inspiring better health, Inspiring a better you, it's better here

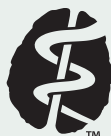

# The American Journal of Psychiatry

Official Journal of the American Psychiatric Association

## Officers 2017–2018

### President

Anita S. Everett, M.D.

### President-Elect

Altha J. Stewart, M.D.

### Treasurer

Bruce J. Schwartz, M.D.

### Secretary

Philip R. Muskin, M.D., M.A.

### Assembly

#### Speaker

Theresa M. Miskimen, M.D.

#### Speaker-Elect

James R. Batterson, M.D.

#### Recorder

Steven R. Daviss, M.D.

### Office of the CEO and Medical Director

#### CEO and Medical Director

Saul Levin, M.D., M.P.A.

### Board of Trustees

Jeffrey Akaka, M.D.

Lama Bazzi, M.D.

Renée L. Binder, M.D.

Jenny Boyer, M.D., Ph.D., J.D.

Ronald M. Burd, M.D.

Tanuja Gandhi, M.D.

Jeffrey L. Geller, M.D., M.P.H.

Uchenna B. Okoye, M.D., M.P.H.

Maria A. Oquendo, M.D., Ph.D.

Roger Peele, M.D.

Vivian B. Pender, M.D.

Paul Summergrad, M.D.

Richard F. Summers, M.D.

Ramaswamy Viswanathan, M.D., D.M.Sc.

Melinda Young, M.D.

## Editorial Board

### Editor

Robert Freedman, M.D.

### Deputy Editors

David A. Lewis, M.D.

Robert Michels, M.D.

Daniel S. Pine, M.D.

A. John Rush, M.D.

Susan K. Schultz, M.D.

Carol A. Tamminga, M.D.

### Associate Editors

Alan Brown, M.D., M.P.H.

Tyrone Cannon, Ph.D.

Benjamin G. Druss, M.D., M.P.H.

Felton Earls, M.D.

Graham J. Emslie, M.D.

Yasmin Hurd, Ph.D.

Joan L. Luby, M.D.

Constantine G. Lyketsos, M.D., M.H.S.

Helen S. Mayberg, M.D., F.R.C.P.C.

Terrie E. Moffitt, Ph.D.

Rajesh Narendran, M.D.

Roy Perlis, M.D.

Anita Thapar, M.B.B.Ch., F.R.C.Psych.,

Ph.D., F.Med.Sci.

Mauricio Tohen, M.D., Dr.PH., M.B.A.

Eduard Vieta, M.D., Ph.D.

Katherine L. Wisner, M.D., M.S.

Xin Yu, M.D.

### Editor Emerita

Nancy C. Andreasen, M.D., Ph.D.

### Former Editors

Amariah Brigham, M.D., 1844–1849

T. Romeyn Beck, M.D., 1849–1854

John P. Gray, M.D., 1854–1886

G. Alder Blumer, M.D., 1886–1894

Richard Dewey, M.D., 1894–1897

Henry M. Hurd, M.D., 1897–1904

Edward N. Brush, M.D., 1904–1931

Clarence B. Farrar, M.D., 1931–1965

Francis J. Braceland, M.D., 1965–1978

John C. Nemiah, M.D., 1978–1993

### Editorial Staff

#### Executive Editor

Michael D. Roy

#### Senior Editors

John J. Guardiano, Ph.D.

Jane Weaver

#### Production Manager

Susan Westrate

#### Assistant Editor

Angela Moore

#### Online Content Manager

Michael Pogachar

#### Editorial Support Services Manager

Heidi Koch

#### Editorial Assistant

Linda LaCour

#### Editorial Assistant/ Permissions Coordinator

Efrem Tuquabo

#### Spanish Content Manager

Sergi Casals, M.A.

#### Assistants to the Editors

Lois Lilienthal

Laura English

Rachel Hogg

Russell A. Scholl

### Interim Publisher

John McDuffie

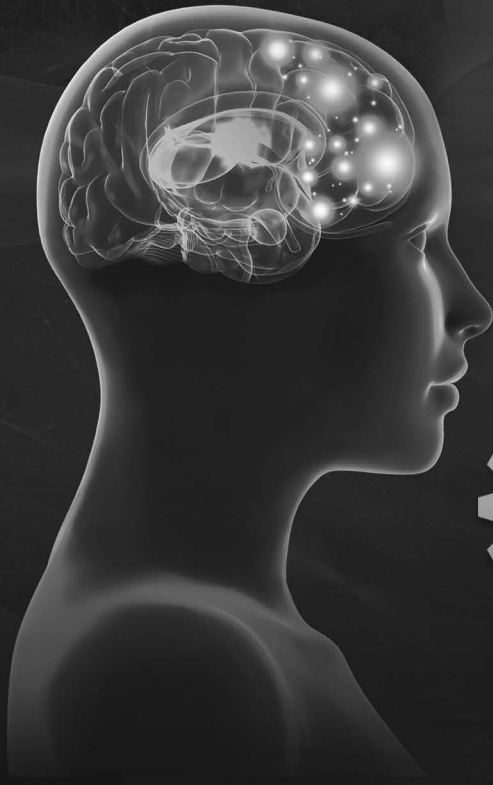

MEASURE  
EXECUTIVE FUNCTION  
STRENGTHS &  
WEAKNESSES  
IN ADULTS 18 & OLDER  
WITH THE NEW

 **CEFI Adult**<sup>TM</sup>  
COMPREHENSIVE EXECUTIVE FUNCTION INVENTORY ADULT

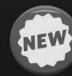

Available SUMMER 2017

Deficits in executive function skills can impair problem solving, reasoning, and adaptive behavior, making even the simplest tasks a challenge.

Ensure those in your care receive the best support with the newest measure of executive function available.

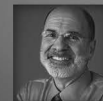

**Author Team**

**Jack A.  
Naglieri, Ph.D.**

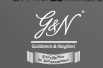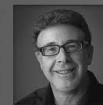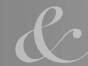

**Sam  
Goldstein, Ph.D.**

- Use the CEFI Adult's **nine comprehensive scales** to guide targeted intervention
- Interpreting results has never been simpler with our acclaimed **easy to read report options**
- Rely on **highly accurate results** based on extensive norming

**Special Offer!**

**FREE**

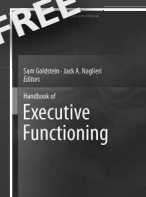

Receive a **FREE** copy of Dr. Naglieri and Dr. Goldstein's "Handbook of Executive Functioning" (\$90 value) with purchase of any CEFI Adult Kit\*

*Available for a limited time while supplies last.*

Go to [www.mhs.com/CEFIAdult](http://www.mhs.com/CEFIAdult) for more details or contact your MHS consultant

\*Some restrictions apply. Please see [mhs.com/cefiadult](http://mhs.com/cefiadult) for more details.

 **MHS**<sup>®</sup>  
ASSESSMENTS

[MHS.com/CEFIadult](http://MHS.com/CEFIadult)

## PERSPECTIVES

### EDITORIALS

#### 821 New Genetic Discoveries in Anorexia Nervosa: Implications for the Field

*Pamela B. Mahon, Ph.D., et al.*

#### 823 How Can We Encourage Medical Student Interest in Psychiatric Careers?

*Lois E. Krahn, M.D.*

#### 825 On the Road to Physiological Models of Brain Function in ADHD

*Francisco X. Castellanos, M.D., Shereen E. Elmaghrabi, B.S.*

#### 827 Drug Treatments for ADHD Reduce Risk of Substance Use Disorders

*Philip Asherson, M.R.C.Psych., Ph.D.*

### COMMENTARY

#### 829 Why Are Innovative Drugs Failing in Phase III?

*Stephen R. Marder, M.D., et al.*

Large phase III trials with aggressive timelines often result in high rates of placebo response, obscuring the new drug's possible advantages. Possible remedies include independent patient selection, design changes to reduce placebo response, and closer study monitoring.

### INTROSPECTIONS

#### 832 An Unexpected Sight in the Rearview Mirror

*Lawrence D. Blum, M.D.*

### TREATMENT IN PSYCHIATRY

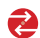

#### 833 Challenges in Treating Undocumented Immigrants

*Neil Krishan Aggarwal, M.D., M.A.* [CME](#) • [AUDIO](#)

Barriers to caring for unauthorized immigrants arise from clinicians' reactions as well as societal and patient factors. Culture and ethnicity trigger countertransference responses of overfriendliness, mistrust and hostility, or ambivalence.

### IMAGES IN PSYCHIATRY

#### 838 The Character Heads by Franz Messerschmidt: An Example of Art Therapy

*Antonio Perciaccante, M.D., Alessia Coralli, B.S.N.*

### REVIEWS AND OVERVIEWS

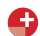

#### 840 The Long-Term Effects of Antipsychotic Medication on Clinical Course in Schizophrenia

*Donald C. Goff, M.D., et al.* [AUDIO](#) • [VIDEO](#)

**Clinical Guidance:** Antipsychotic drugs are beneficial in initial treatment of schizophrenia and in preventing relapse. There is little evidence that they worsen illness course or cause cognitive deficits. A few patients recover or remain stable without pharmacologic treatment, but currently there is no marker to identify them prospectively.

## NEW RESEARCH

### ARTICLES

#### 850 Significant Locus and Metabolic Genetic Correlations Revealed in Genome-Wide Association Study of Anorexia Nervosa

Laramie Duncan, Ph.D., et al. EDITORIAL • AUDIO • VIDEO

Anorexia nervosa has a heritability estimate of 20% and has genetic correlations not only with psychiatric disorders but also with metabolic traits. Anorexia has a significant locus on chromosome 12 that was previously reported for type 1 diabetes and general autoimmune disorder.

#### 859 Stability of and Factors Related to Medical Student Specialty Choice of Psychiatry

Matthew N. Goldenberg, M.D., M.Sc., et al. EDITORIAL • CME • AUDIO

An excellent psychiatry clerkship is the factor most likely to persuade medical students to specialize in psychiatry. Most students choosing psychiatry do so during medical school, and those who begin with this choice are likely to maintain it.

#### 867 Defining the Neural Substrate of the Adult Outcome of Childhood ADHD: A Multimodal Neuroimaging Study of Response Inhibition

Eszter Szekely, Ph.D., et al. EDITORIAL

Adults with remitted childhood ADHD and adults with persistent ADHD both have right caudate anomalies during response inhibition. Differences between groups are present in cortical and cerebellar regions, with underactivation in adults with persistent ADHD but not those in remission.

#### 877 ADHD Medication and Substance-Related Problems

Patrick D. Quinn, Ph.D., et al. EDITORIAL • CME • AUDIO

**Clinical Guidance:** Medication for attention deficit hyperactivity disorder (ADHD) lowers concurrent risk for substance-related problems. ADHD medication also lowers risk of future substance-related events for men and possibly for women.

#### 886 Incomes and Outcomes: Social Security Disability Benefits in First-Episode Psychosis

Robert A. Rosenheck, M.D., et al. AUDIO

The RAISE 2-year multifaceted program for patients with first-episode psychosis did not reduce the likelihood of receiving Social Security disability benefits. Patients who got disability benefits had higher incomes and less frequent alcohol intoxication but fewer days of employment and poorer motivation.

#### 895 A Brain Model of Disturbed Self-Appraisal in Depression

Christopher G. Davey, M.D., Ph.D., et al.

Disturbed self-appraisal in depression causes more negative modulation of connectivity between the medial prefrontal cortex and posterior cingulate cortex. This prefrontal "hyperregulation" is associated with poor concentration and inner tension.

## COMMUNICATIONS AND UPDATES

### LETTERS TO THE EDITOR

#### 904 Tele-Operating an Android Robot to Promote the Understanding of Facial Expressions and to Increase Facial Expressivity in Individuals With Autism Spectrum Disorder

Hirokazu Kumazaki, M.D., Ph.D., et al.

#### 905 Association Between Low Barometric Pressure and Completed Suicides

Rif S. El-Mallakh, M.D., et al.

### BOOK FORUM

#### 906 Yale Textbook of Public Psychiatry

Thomas E. Smith, M.D.

#### 908 Books Received

907 Correction

909 Continuing Medical Education

A8 Chairpersons of APA Councils, Committees, and Task Forces

A11 Subscription and Business Information

**Cover:** The number of medical students selecting psychiatry for their post-graduate training has varied over time. Goldenberg and colleagues (p. 859) used survey data from medical school graduating classes in 2013 and 2014 to identify factors associated with selecting psychiatry as a career. Images by Andrey Popov, ConstantinosZ, and Antonio Guillem, Shutterstock.com.

Article content that addresses **Core Competencies**, defined by the Accreditation Council of Graduate Medical Education and the American Board of Medical Specialties, is indicated by the following symbols:

-  Professionalism
-  Patient Care and Procedural Skills
-  Medical Knowledge
-  Practice-Based Learning and Improvement
-  Interpersonal and Communication Skills
-  Systems-Based Practice.

More information is available at <http://www.abms.org/board-certification/a-trusted-credential/based-on-core-competencies/>

**La Tabla de Contenidos de Este Número  
Está Disponible en Español**

*(This issue's Table of Contents are available in Spanish)  
(Abstracts are also available in Spanish)*

Translation presented in collaboration with the Office of Global Health, Rutgers-Robert Wood Johnson Medical School

Support for this effort provided by ACTA Colombia.

**Translation courtesy of**

**Sergi Casals, M.A.**

Garuna, Medellin, Colombia ([www.garunaeditors.com](http://www.garunaeditors.com))

**Carlos Lopez Jaramillo, M.D.**

Universidad de Antioquia, Medellin, Colombia

**Javier I. Escobar, M.D., M.Sc.**

Rutgers-Robert Wood Johnson Medical School

**AUDIO** Highlighted in AJP Audio, a downloadable .mp3 file available at [ajp.psychiatryonline.org](http://ajp.psychiatryonline.org)

**CME** A course covering the content of this article is available online for paid subscribers to the AJP CME Course program

**EDITORIAL** Discussed in one of the issue's editorials

**VIDEO** Highlighted online by Deputy Editor Daniel S. Pine, M.D.



# THE AMERICAN PSYCHIATRIC ASSOCIATION

1000 Wilson Blvd., Suite 1825, Arlington, VA 22209-3901  
(888) 357-7924 (toll-free inside the U.S. and Canada) / (703) 907-7300  
web site: [www.psychiatry.org](http://www.psychiatry.org) • e-mail: [apa@psych.org](mailto:apa@psych.org)

## Chairpersons of Councils, Committees, and Task Forces

### Standing Committees

|                             |                               |
|-----------------------------|-------------------------------|
| <b>Bylaws</b>               | Esperanza Diaz, M.D.          |
| <b>Elections</b>            | Barry K. Herman, M.D.         |
| <b>Ethics</b>               | Ezra Griffith, M.D.           |
| <b>Finance and Budget</b>   | Alan F. Schatzberg, M.D.      |
| <i>Audit</i>                | Bruce J. Schwartz, M.D.       |
| <i>Investment Oversight</i> | David Fassler, M.D.           |
| <b>Joint Reference</b>      | Altha J. Stewart, M.D.        |
| <b>Membership</b>           | Rahn K. Bailey, M.D.          |
| <b>Nominating</b>           | Maria A. Oquendo, M.D., Ph.D. |
| <b>Tellers</b>              | Jose Vito, M.D.               |

### Non-Standing Committee

|                             |                              |
|-----------------------------|------------------------------|
| <b>Conflict of Interest</b> | Philip R. Muskin, M.D., M.A. |
|-----------------------------|------------------------------|

### Councils

#### Council on Addiction Psychiatry

Andrew J. Saxon, M.D.

#### Council on Advocacy and Government Relations

Patrick S. Runnels, M.D.

*Advocacy and Litigation Funding*

Bhasker J. Dave, M.D.

#### Council on Children, Adolescents, and Their Families

Joseph V. Penn, M.D.

#### Council on Communications

Christopher A. (Drew) Ramsey, M.D.

#### Council on Geriatric Psychiatry

Robert P. Roca, M.D.

#### Council on Healthcare Systems and Financing

Harsh K. Trivedi, M.D.

*Integrated Care*

Lori E. Raney, M.D.

*Reimbursement for Psychiatric Care*

Laurence Miller, M.D.

*RBRVS, Codes and Reimbursement*

Gregory G. Harris, M.D.

*Telepsychiatry*

James H. Shore, M.D.

#### Council on International Psychiatry

Bernardo Ng, M.D.

#### Council on Medical Education and Lifelong Learning

Mark H. Rapaport, M.D.

*Scientific Program*

Linda Worley, M.D.

*Scientific Program—IPS*

Michael T. Compton, M.D., M.P.H.

*Vestermark Award Committee*

Lowell D. Tong, M.D.

#### Council on Minority Mental Health and Health Disparities

Christina V. Mangurian, M.D.

#### Council on Psychiatry and Law

Debra A. Pinals, M.D.

*Judicial Action*

Marvin S. Swartz, M.D.

#### Council on Psychosomatic Medicine (Consultation Liaison Psychiatry)

David F. Gitlin, M.D.

#### Council on Quality Care

Grayson Norquist, M.D.

*Mental Health Information Technology*

Brent Nelson, M.D.

*Performance Measures*

Karen Pierce, M.D.

*Practice Guidelines*

Michael J. Vergare, M.D.

#### Council on Research

Dwight L. Evans, M.D.

*Psychiatric Dimensions of Disasters*

Robert J. Ursano, M.D.

# Go Online

Visit [ajp.psychiatryonline.org](http://ajp.psychiatryonline.org) for these features!

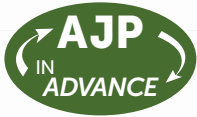

## AJP in Advance

*Discover the latest research advances before they appear in print*

### **Genetic Heterogeneity in Depressive Symptoms Following the Death of a Spouse: Polygenic Score Analysis of the U.S. Health and Retirement Study**

Older adults' depressive symptom levels following death of a spouse were lower among those with higher scores for genetic influence on subjective well-being.

### **Premenstrual Dysphoric Disorder Symptoms Following Ovarian Suppression: Triggered by Change in Ovarian Steroid Levels But Not Continuous Stable Levels**

Women whose PMDD symptoms improved during ovarian suppression with leuprolide, a GnRH agonist, had symptom increases when estradiol and progesterone were first reintroduced. Symptoms again improved when hormone levels stabilized.

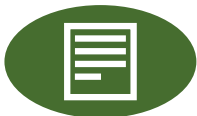

## AJP CME

*Earn CME credit: 3 courses per issue*

This month's courses appear on pages 909–912. Each short course is based on one article in this issue and can earn up to 1 *AMA PRA Category 1 Credit*<sup>™</sup>. CME credit is issued only **online**, and a paid subscription to AJP's CME course program is required.

Visit [psychiatryonline.org/cme](http://psychiatryonline.org/cme) and click on the "American Journal of Psychiatry" tab.

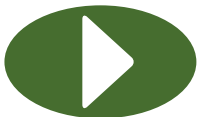

## AJP Multimedia

*Access Audio or Video for highlights of each issue*

In AJP Audio this month, Deputy Editor Susan K. Schultz, M.D., discusses challenges in treating undocumented immigrants, long-term effects of antipsychotics in schizophrenia, whether substance use problems are associated with medications for ADHD, use of Social Security disability benefits by patients with first-episode psychosis receiving multifaceted specialty care, a large genome-wide association study of anorexia nervosa, and when and why medical students choose to specialize in psychiatry.

In this month's video, Deputy Editor Daniel S. Pine, M.D., discusses the articles "The Long-Term Effects of Antipsychotic Medication on Clinical Course in Schizophrenia" and "Significant Locus and Metabolic Genetic Correlations Revealed in Genome-Wide Association Study of Anorexia Nervosa."

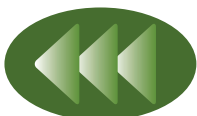

## History of Psychiatry

*Revisit the field's rich history through the pages of AJP*

### **75 years ago this month: "The Psychiatric Aspects of Marihuana Intoxication"**

In the September 1942 issue, Drs. Samuel Allentuck and Karl M. Bowman, in a study of 77 volunteers, found "no evidence to suggest that the continued use of marihuana is a stepping-stone to the use of opiates . . . nor have we observed any permanent deleterious effects from its continued use. Quite the contrary, marihuana and its derivatives and allied synthetics have potentially valuable therapeutic applications which merit future investigation." A further Discussion by Dr. Lawrence Kolb offers some caveats, as well as additional historical-cultural context for today's reader.

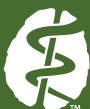

# APA Seeks Editor-in-Chief for The American Journal of Psychiatry

The American Psychiatric Association (APA) is seeking applicants for the position of Editor of its official journal, *The American Journal of Psychiatry*. The current Editor concludes his final term on December 31, 2018.

The Editor is responsible for

- maintaining an overall plan/model concerning format and overall editorial direction of content published by the *Journal*
- nominating members of the Editorial Board and working with them in preparing and implementing policy, content directions, and procedures
- soliciting contributions from highly respected voices of authority in subject areas of interest to the field
- overseeing and ensuring the rigorous and equitable peer review of manuscripts—selecting reviewers, monitoring modifications of revised and resubmitted manuscripts, and making disposition decisions—in a process that is facilitated by an online manuscript tracking system and editorial staff
- organizing the content of each issue
- planning and implementing new features as appropriate
- keeping abreast of ongoing changes and advances in scientific and medical journal publishing, such as quality assurance and accountability and issues of scientific integrity

The position of Editor is a part-time position (20–30%). Most work is done via the Internet and telephone.

Applicants must be APA members with significant publishing and editorial experience.

Applications are due to the Search Committee by **November 1, 2017**. Candidates should submit their curriculum vitae and a cover letter outlining their vision for *The American Journal of Psychiatry* and their qualifications to realize this vision. Application materials should be sent by e-mail to the Search Committee c/o the journal's Executive Editor, Michael Roy (mroy@psych.org).

AMERICAN  
PSYCHIATRIC  
ASSOCIATION

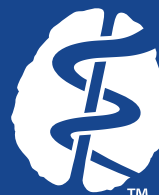

Source: http://ajp.psychiatryonline.org/doi/suppl/10.1176/ajp.2017.174.issue-9/suppl_file/front.pdf
