## PERSPECTIVAS

### EDITORIALES

- 821 Nuevos descubrimientos genéticos en anorexia nerviosa: Implicaciones para el área**  
*Pamela B. Mahon, Ph.D., et al.*
- 823 ¿Cómo podemos fomentar el interés de los estudiantes de medicina en las carreras en psiquiatría?**  
*Lois E. Krahn, M.D.*
- 825 Rumbo a modelos fisiológicos de función cerebral en TDAH**  
*Francisco X. Castellanos, M.D., Shereen E. Elmaghrabi, B.S.*
- 827 Tratamientos con medicamentos para el TDAH reducen el riesgo de trastornos por consumo de sustancias**  
*Philip Asherson, M.R.C.Psych., Ph.D.*

### COMENTARIO

- 829 ¿Por qué los medicamentos innovadores fallan en la fase III?**  
*Stephen R. Marder, M.D., et al.*

### INTROSPECCIÓN

- 832 Una vista inesperada en el espejo retrovisor**  
*Lawrence D. Blum, M.D.*

### TRATAMIENTO EN PSIQUIATRÍA

-  **833 Retos en el tratamiento de inmigrantes indocumentados**  
*Neil Krishan Aggarwal, M.D., M.A.* [EMC](#) • [AUDIO](#)

### IMÁGENES EN PSIQUIATRÍA

- 838 Las cabezas de personajes de Franz Messerschmidt: Un ejemplo de terapia artística**  
*Antonio Perciaccante, M.D., Alessia Coralli, B.S.N.*

### REVISIÓN Y RESEÑAS

-  **840 Los efectos a largo plazo de los antipsicóticos en el curso clínico de la esquizofrenia**  
*Donald C. Goff, M.D., et al.* [AUDIO](#) • [VIDEO](#) • [GUÍAS CLÍNICAS](#)

## NUEVAS INVESTIGACIONES

### ARTÍCULOS

- 850 Correlaciones genéticas metabólicas y de sitio (*locus*) significativas reveladas en el estudio de asociación del genoma completo de la anorexia nerviosa**  
*Laramie Duncan, Ph.D., et al.* [EDITORIAL](#) • [AUDIO](#) • [VIDEO](#)
- 859 Estabilidad de la elección de la especialidad de psiquiatría por parte de los estudiantes de medicina y factores relacionados**  
*Matthew N. Goldenberg, M.D., M.Sc., et al.* [EDITORIAL](#) • [EMC](#) • [AUDIO](#)
- 867 Definición del sustrato neural del resultado en la edad adulta del TDAH en la infancia: Un estudio multimodal de neuroimágenes de la inhibición de respuestas**  
*Eszter Szekely, Ph.D., et al.* [EDITORIAL](#)

- 877 Medicación para el TDAH y problemas relacionados con las sustancias**  
*Patrick D. Quinn, Ph.D., et al.* EDITORIAL • EMC • AUDIO • GUÍAS CLÍNICAS
- 886 Ingresos y egresos: Beneficios por incapacidad de la seguridad social en el primer episodio de psicosis**  
*Robert A. Rosenheck, M.D., et al.* AUDIO
- 895 Un modelo cerebral de valoración personal alterada en depresión**  
*Christopher G. Davey, M.D., Ph.D., et al.*

## COMUNICADOS Y ACTUALIZACIONES

### CARTAS AL EDITOR

- 904 Tele-operando un robot androide para fomentar la comprensión de las expresiones faciales y para aumentar la expresividad facial en individuos con trastornos del espectro del autismo**  
*Hirokazu Kumazaki, M.D., Ph.D., et al.*
- 905 Asociación entre la baja presión barométrica y los suicidios consumados**  
*Rif S. El-Mallakh, M.D., et al.*

### RESEÑAS BIBLIOGRÁFICAS

- 906 Yale Textbook of Public Psychiatry [Manual de psiquiatría pública de Yale]**  
*Thomas E. Smith, M.D.*
- 908 Libros recibidos**

## OTROS TEMAS DE INTERÉS

- 907 [Correction]**
- 909 Educación Médica Continuada**

**Cubierta:** [The number of medical students selecting psychiatry for their post-graduate training has varied over time. Goldenberg and colleagues (p. 859) used survey data from medical school graduating classes in 2013 and 2014 to identify factors associated with selecting psychiatry as a career. Images by Andrey Popov, ConstantinosZ, and Antonio Guillem, Shutterstock.com.]

Article content that addresses **Core Competencies**, defined by the Accreditation Council of Graduate Medical Education and the American Board of Medical Specialties, is indicated by the following symbols:

- |                                                                                                                            |                                                                                                                             |
|----------------------------------------------------------------------------------------------------------------------------|-----------------------------------------------------------------------------------------------------------------------------|
|  Professionalism                        |  Patient Care and Procedural Skills      |
|  Medical Knowledge                      |  Practice-Based Learning and Improvement |
|  Interpersonal and Communication Skills |  Systems-Based Practice.                 |

More information is available at [www.abms.org/board-certification/a-trusted-credential/based-on-core-competencies/](http://www.abms.org/board-certification/a-trusted-credential/based-on-core-competencies/)

- AUDIO** Highlighted in AJP Audio, a downloadable .mp3 file available at [ajp.psychiatryonline.org](http://ajp.psychiatryonline.org)
- EMC** A course covering the content of this article is available online for paid subscribers to the AJP EMC Course program
- EDITORIAL** Discussed in one of the issue's editorials
- GUÍAS CLÍNICAS** Guías clínicas provided on the English table of contents
- VIDEO** Highlighted online by Deputy Editor Daniel S. Pine, M.D.

### La Tabla de Contenidos y resúmenes de Este Número Está Disponible en Español

*(This issue's Table of Contents and abstracts are available in Spanish)*

Translation presented in collaboration with the Office of Global Health, Rutgers-Robert Wood Johnson Medical School

Support for this effort provided by ACTA Colombia.

#### Translation courtesy of

**Sergi Casals, M.A.**, Garuna, Medellín, Colombia ([www.garunaeditors.com](http://www.garunaeditors.com))  
**Carlos Lopez Jaramillo, M.D.**, Universidad de Antioquia, Medellín, Colombia  
**Javier I. Escobar, M.D., M.Sc.**, Rutgers-Robert Wood Johnson Medical School

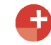

## Los efectos a largo plazo de los antipsicóticos en el curso clínico de la esquizofrenia

Donald C. Goff, M.D., Peter Falkai, M.D., Ph.D., W. Wolfgang Fleischhacker, M.D., Ragy R. Girgis, M.D., Rene M. Kahn, M.D., Ph.D., Hiroyuki Uchida, M.D., Ph.D., Jingping Zhao, M.D., Ph.D., Jeffrey A. Lieberman, M.D.

Se han planteado interrogantes en relación a que el tratamiento con antipsicóticos podría tener efectos negativos en los resultados a largo plazo para las personas con esquizofrenia. Las pruebas que se aducen para sustentar estos interrogantes incluyen la asociación del tratamiento con antipsicóticos a la reducción del volumen cerebral y a la sensibilización de los receptores de dopamina, que podría hacer a los pacientes vulnerables a las recaídas y a la progresión de la enfermedad. Se convocó un grupo internacional de expertos para analizar hallazgos de investigación clínica y básica, relevantes para dichos interrogantes. Se encontraron pocas pruebas que apoyaran la hipótesis que el tratamiento con antipsicóticos, inicial o de mantenimiento, tuviera un efecto negativo a largo plazo en los resultados, en comparación con la no administración del tratamiento. Ensayos controlados aleatorizados

apoyan firmemente la eficacia de los antipsicóticos para el tratamiento agudo de la psicosis y la prevención de recaídas; evidencia correlacionada sugiere que la intervención temprana y la duración reducida de la psicosis no tratada podrían mejorar los resultados a más largo plazo. Las estrategias para la discontinuación del tratamiento o los enfoques de tratamientos no farmacológicos alternativos pueden beneficiar a un subgrupo de pacientes, pero pueden asociarse a un riesgo incremental de recaída y deben ser objeto de más investigación, incluyendo el desarrollo de biomarcadores que permitirán un enfoque del tratamiento individualizado desde la medicina de precisión.

(*Am J Psychiatry* 2017; 174:840–849)

## Correlaciones genéticas metabólicas y de sitio (*locus*) significativas reveladas en el estudio de asociación del genoma completo de la anorexia nerviosa

Laramie Duncan, Ph.D., Zeynep Yilmaz, Ph.D., Helena Gaspar, Ph.D., Raymond Walters, Ph.D., Jackie Goldstein, Ph.D., Verner Anttila, Ph.D., Brendan Bulik-Sullivan, Ph.D., Stephan Ripke, M.D., Ph.D., Eating Disorders Working Group of the Psychiatric Genomics Consortium, Laura Thornton, Ph.D., Anke Hinney, Ph.D., Mark Daly, Ph.D., Patrick F. Sullivan, M.D., F.R.A.N.Z.C.P., Eleftheria Zeggini, Ph.D., Gerome Breen, Ph.D., Cynthia M. Bulik, Ph.D.

**Objetivo:** Los autores realizaron un estudio de asociación del genoma completo de la anorexia nerviosa y calcularon las correlaciones genéticas con una serie de fenotipos psiquiátricos, educativos y metabólicos.

**Método:** De acuerdo al control de calidad uniforme y a los procedimientos de imputación que utilizan el Proyecto de 1000 Genomas (fase 3) en 12 cohortes de casos y controles que incluían 3.495 casos de anorexia nerviosa y 10.982 controles, los autores realizaron un análisis de asociación estándar seguido de un meta-análisis de las diferentes cohortes. Se utilizó regresión de las puntuaciones de desequilibrio del ligamiento para calcular el componente hereditario como variante común del genoma completo (componente hereditario basado en polimorfismos de nucleótido simple [SNP] [h<sup>2</sup>SNP]), componente hereditario dividido, y correlaciones genéticas (*r<sub>g</sub>*) entre la anorexia nerviosa y otros 159 fenotipos.

**Resultados:** Se obtuvieron resultados de 10.641.224 SNPs y variantes de inserción-eliminación con bajas frecuencias alélicas >1% y puntuaciones de calidad de imputación >0.6. La h<sup>2</sup>SNP de la anorexia nerviosa fue 0,20 (error estándar (SE)=0,02), lo que sugiere que una fracción sustancial del

componente hereditario basado en gemelos surge de la variación genética común. Los autores identificaron un sitio (*locus*) significativo del genoma completo en el cromosoma 12 (rs4622308) en una región que alberga un *locus* anteriormente reportado de diabetes tipo 1 y trastorno autoinmune. Se observaron correlaciones genéticas positivas significativas entre la anorexia nerviosa y la esquizofrenia, el neuroticismo, el logro educativo y el colesterol de lipoproteína de alta densidad, y se observaron correlaciones genéticas negativas significativas entre la anorexia nerviosa y los fenotipos del índice de masa corporal, la insulina, la glucosa y los lípidos.

**Conclusiones:** La anorexia nerviosa es un fenotipo complejo heredable para el que este estudio ha revelado el primer *locus* significativo del genoma completo. La anorexia nerviosa también tiene correlaciones genéticas altas y significativas tanto con fenotipos psiquiátricos como con rasgos metabólicos. Los resultados del estudio apoyan la re conceptualización de este trastorno frecuentemente letal como un trastorno cuya etiología es tanto psiquiátrica como metabólica.

(*Am J Psychiatry* 2017; 174:850–858)

# Estabilidad de la elección de la especialidad de psiquiatría por parte de los estudiantes de medicina y factores relacionados

Matthew N. Goldenberg, M.D., M.Sc., D. Keith Williams, Ph.D., John J. Spollen, M.D.

**Objetivo:** Se requieren esfuerzos específicos para aumentar el número de estudiantes de medicina que eligen psiquiatría, pero poco se sabe sobre cuándo los estudiantes deciden qué especialidad tomar o sobre qué factores influyen su escogencia. Los autores examinaron el momento y la estabilidad de la elección de la carrera de psiquiatría, en comparación con otras especialidades, por parte de los estudiantes y determinaron qué factores anteriores a su ingreso a la facultad de medicina e internos de la carrera de medicina estuvieron asociados con el hecho de que escogieran una carrera en psiquiatría.

**Método:** Utilizando datos obtenidos de encuestas a estudiantes que se graduaron de facultades de medicina alopática de los EE.UU. en 2013 y 2014 (N=29.713), los autores computaron las tasas de escogencia de la especialidad de psiquiatría al ingreso y a la salida de la facultad de medicina y evaluaron la estabilidad de dicha elección. Se utilizó una regresión logística multivariada ajustada y división recursiva para determinar la asociación de 29 factores con la escogencia de la especialidad de psiquiatría.

**Resultados:** La escogencia de la psiquiatría aumentó de 1,6%

al inicio de la carrera de medicina hasta 4,1% al graduarse. La estabilidad de la elección de la especialidad de psiquiatría desde la matrícula hasta la graduación, ligeramente por encima de 50%, fue mayor que para cualquier otra especialidad. Sin embargo, casi 80% de futuros psiquiatras no mostraron ninguna inclinación hacia esta especialidad en el momento de la matrícula. Una calificación de excelente para la rotación psiquiátrica (*odds ratio*=2,66), una concentración en psicología en la universidad (*odds ratio*=2,58) y valoración del balance entre la vida personal y laboral (*odds ratio*=2,25) fueron los factores más fuertemente asociados con la elección de la carrera de psiquiatría.

**Conclusiones:** Los estudiantes que ingresan a la facultad de medicina con la intención de ser psiquiatras muy probablemente acaban siéndolo, pero la inmensa mayoría de estudiantes que escogen psiquiatría lo hacen durante la carrera de medicina. Aumentar el porcentaje de estudiantes con un pregrado en psicología y ofrecerles una rotación ejemplar en psiquiatría son factores modificables que pueden aumentar la tasa de escogencia de la especialidad de psiquiatría.

(*Am J Psychiatry* 2017; 174:859–866)

## Definición del sustrato neural del resultado en la edad adulta del TDAH en la infancia: Un estudio multimodal de neuroimágenes de la inhibición de respuestas

Eszter Szekely, Ph.D., Gustavo P. Sudre, Ph.D., Wendy Sharp, M.S.W., Ellen Leibenluft, M.D., Philip Shaw, B.M., B.Ch., Ph.D.

**Objetivo:** Entender los procesos neurales ligados al desenlace en la edad adulta del trastorno de déficit de atención e hiperactividad (TDAH) infantil podría ser una guía para intervenciones novedosas que mejoren su evolución clínica. Se ha argumentado que la normalización de la actividad cortical pre frontal provoca la remisión del TDAH, mientras que las anomalías en los procesos subcorticales son «fijos» y se preservan incluso en la remisión. Utilizando neuroimágenes multimodales de procesos inhibitorios, los autores probaron estas hipótesis en adultos a los que se les había hecho seguimiento desde la infancia, y contrastaron el TDAH remitido con el persistente.

**Método:** A pacientes adultos (TDAH persistente, N=35; TDAH remitido, N= 47; nunca afectados, N=99) se les hizo un escáner con IRM (IRMf) (N85), magneto encefalografía (N=33), o ambos (N=63) durante una tarea de inhibición de respuestas.

**Resultados:** En los análisis de IRMf, durante la inhibición, las anomalías del caudado derecho reflejaron un historial de TDAH en la infancia y estuvieron presentes incluso en aque-

llos que remitieron. Por el contrario, aparecieron diferencias relacionadas con el resultado en la edad adulta en las regiones cortical (frontal inferior derecha y pre cúneo/parietal inferior) y cerebelosa. El grupo de TDAH persistente mostró hipo-activación, mientras que el grupo de TDAH remitido no fue significativamente diferente del grupo que nunca fue afectado. La magneto encefalografía mostró que la asociación entre la gravedad de los síntomas adultos y la actividad neuronal pre frontal se limitaba al periodo de tiempo que duraba el acto de inhibición (300 ms-350 ms). Se presentaron diferencias entre grupos en la actividad neuronal cerebelosa y parietal durante el periodo de tiempo de los procesos de monitoreo del desempeño (500 ms-600 ms).

**Conclusiones:** Al combinar la IRMf y la magnetoencefalografía, se detectó la ubicación y el periodo de tiempo de la actividad neuronal que sustenta el resultado en la edad adulta del TDAH. De este modo, los procesos cortico-cerebelosos que están ligados a la evolución clínica del TDAH se separan de los procesos subcorticales que no lo están.

(*Am J Psychiatry* 2017; 174:867-876)

## Medicación para el TDAH y problemas relacionados con las sustancias

Patrick D. Quinn, Ph.D., Zheng Chang, Ph.D., Kwan Hur, Ph.D., Robert D. Gibbons, Ph.D., Benjamin B. Lahey, Ph.D., Martin E. Rickert, Ph.D., Arvid Sjölander, Ph.D., Paul Lichtenstein, Ph.D., Henrik Larsson, Ph.D., Brian M. D'Onofrio, Ph.D.

**Objetivo:** Los trastornos por consumo de sustancias contribuyen de forma importante a la excesiva mortalidad de individuos con trastorno por déficit de atención e hiperactividad (TDAH), y sin embargo las asociaciones entre el tratamiento farmacológico del TDAH y los problemas relacionados con sustancias siguen sin estar claras. Este estudio investigó asociaciones concurrentes y a largo plazo entre el tratamiento con medicamentos del TDAH y los sucesos relacionados con sustancias.

**Método:** Los autores analizaron cobranzas de sistemas comerciales de salud de 2.993.887 (47,2% mujeres) pacientes adolescentes y adultos con TDAH durante 2005 y 2014. Análisis intra-sujeto compararon el riesgo de sucesos relacionados con sustancias (p. ej., visitas a urgencias relacionadas con trastornos por consumo de sustancias) durante los meses en los que los pacientes recibían estimulantes prescritos o atomoxetina relativo al riesgo durante los meses en que no recibían estos medicamentos.

**Resultados:** En comparaciones intra-sujeto ajustadas, relativas a los períodos en los que los pacientes no recibían medicación para el TDAH, los pacientes hombres tuvieron una probabilidad 35% inferior de sucesos concurrentes relacionados con sustancias cuando recibían medicación (*odds ratio*=

*0,65*; IC 95%=0,64–0,67), y las pacientes mujeres tuvieron una probabilidad 31% inferior de sucesos concurrentes relacionados con sustancias (*odds ratio*=0,69; IC 95%=0,67–0,71). Además, los pacientes hombres tuvieron una probabilidad 19% inferior de sucesos relacionados con sustancias 2 años después de los periodos de medicación (*odds ratio*=0,81; IC 95%=0,78–0,85), y las pacientes mujeres tuvieron una probabilidad 14% inferior de sucesos relacionados con sustancias 2 años después de los periodos de medicación (*odds ratio*=0,86; IC 95%= 0,82–0,91). Los análisis de sensibilidad confirmaron la mayoría de los hallazgos, pero fueron menos consistentes para las asociaciones a largo plazo en las mujeres.

**Conclusiones:** Estos resultados brindan evidencia de que es poco probable que el recibir medicamentos para el TDAH esté asociado con un mayor riesgo de problemas relacionados con las sustancias en la adolescencia o la edad adulta. Por el contrario, los medicamentos estuvieron asociados con un riesgo concurrente inferior de sucesos relacionados con las sustancias y, por lo menos en los hombres, a un riesgo inferior a largo-plazo de futuros sucesos relacionados con sustancias.

(*Am J Psychiatry* 2017; 174:877–885)

## Ingresos y egresos: Beneficios por incapacidad de la seguridad social en el primer episodio de psicosis

Robert A. Rosenheck, M.D., Sue E. Estroff, Ph.D., Kyaw Sint, M.P.H., Haiqun Lin, Ph.D., Kim T. Mueser, Ph.D., Delbert G. Robinson, M.D., Nina R. Schooler, Ph.D., Patricia Marcy, B.S.N., John M. Kane, M.D., for the RAISE-ETP Investigators

**Objetivo:** Los beneficios por incapacidad de la seguridad social en *los Estados Unidos* (SSA, por sus siglas en inglés) son una fuente de ingresos importante para las personas con psicosis y dan derecho al seguro de salud. Los autores examinaron el impacto de la atención coordinada de especialidades en la recepción de dichos beneficios en el primer episodio de psicosis, junto con los correlatos y las consecuencias de recibirlos.

**Método:** El programa de recuperación después del primer episodio de esquizofrenia–tratamiento temprano (RAISE-ETP, por sus siglas en inglés), comparó NAVIGATE, un programa de atención coordinada de especialidades, con la atención comunitaria normal durante 2 años. Se evaluó la recepción de beneficios de la seguridad social y los resultados clínicos en el momento de ingresar al programa y cada 6 meses durante 2 años. Se utilizó análisis de regresión segmentada para identificar el cambio relativo en las trayectorias resultantes después de la recepción de los beneficios por incapacidad.

**Resultados:** De 399 participantes de RAISE-ETP, 36 (9%) estaban recibiendo beneficios de la seguridad social al inicio

del estudio; del resto, 124 (34,1%) obtuvieron beneficios durante el periodo de estudio de 2 años. La intervención de NAVIGATE mejoró la calidad de vida, los síntomas y el empleo, pero no redujo de forma significativa la probabilidad de recibir beneficios de la seguridad social por discapacidad. La obtención de beneficios fue predicha por síntomas psicóticos más graves y mayor disfunción, y fue seguida por mayores ingresos totales pero menos días de empleo, motivación disminuida (p. ej., sentido de propósito, mayor anhedonia) y menos días de intoxicación.

**Conclusiones:** Una intervención de atención coordinada de especialidades de 2 años no redujo la recepción de beneficios de la seguridad social por incapacidad. Hubo algunas ventajas para los que obtuvieron beneficios de la seguridad social por incapacidad durante el periodo de tratamiento de 2 años, pero también hubo algunas consecuencias adversas imprevistas. Ofrecer prestaciones económicas complementarias sin perjudicar la recuperación sigue siendo un reto importante en cuanto a las políticas.

(*Am J Psychiatry* 2017; 174:886–894)



## Un modelo cerebral de valoración personal alterada en depresión

Christopher G. Davey, M.D., Ph.D., Michael Breakspear, M.D., Ph.D., Jesus Pujol, M.D., Ph.D., Ben J. Harrison, Ph.D.

**Objetivo:** Un sentido alterado de uno mismo es una característica clave de la depresión. La corteza prefrontal media, que juega un papel central en los procesos de auto-valoración, a menudo está involucrada en la enfermedad, aunque sigue sin estar claro cómo las alteraciones funcionales de la región contribuyen a las alteraciones observadas. El objetivo de este estudio fue aclarar el papel de la corteza prefrontal media en los procesos de auto-valoración en la depresión.

**Método:** Los autores aplicaron un modelo de red dinámica de cognición auto-dirigida desarrollado recientemente a los datos de IRM de 71 adolescentes y adultos jóvenes con trastorno de depresión mayor, ninguno de los cuales estaba recibiendo tratamiento con medicación, y de 88 controles sanos. Se utilizaron Promedios de Modelo Bayesiano para determinar estimados de los parámetros para los modelos causales dinámicos, que se compararon entre grupos.

**Resultados:** Si bien se mostró que los procesos cognitivos

auto dirigidos en el grupo de depresión se basan en la misma red dinámica que en el grupo de controles sanos, la corteza pre frontal media tuvo un efecto "hiperregulador" en la corteza cingulada posterior en el grupo deprimido, en el que la auto-valoración causó una modulación significativamente más negativa de la conectividad entre la corteza pre frontal media y la corteza cingulada posterior que en el grupo control (*odds ratio*=0,54; IC 95%=0,38–0,77). Este parámetro estuvo relacionado inversamente de forma significativa con un factor de la depresión relacionado con la poca concentración y la tensión interior ( $r=-0,32$ ; IC 95%=-0,51- -0,08).

**Conclusiones:** La influencia exagerada de la corteza pre frontal media en la corteza cingulada posterior en la depresión es un correlato neural de la auto-valoración alterada característica de la enfermedad.

(*Am J Psychiatry* 2017; 174:895–903)
